# Supplementary material for: Longitudinal Clinical Features of Post-COVID-19 Patients—Symptoms, Fatigue and Physical Function at 3- and 6-Month Follow-Up
Source: MDPI journal article supplement (doi:10.3390/jcm12123966), 2023-06-10
Supplement: s1 [file s1]

## Supplement

**Table S1:** Detailed change from T0 to T1 to T2. Statistics: Linear mixed effects model adjusted for corona wave, age, sex and diabetes. <sup>a)</sup>Interaction with virus waves: differences vs T0 visit depend on virus wave, where initial infection occurred.

|                                        | <b>T0</b>   | <b>T1</b>   | <b>T2</b>   | <b>T1 vs T0</b> | <b>T2 vs T0</b> | <b>T2 vs T1</b> |
|----------------------------------------|-------------|-------------|-------------|-----------------|-----------------|-----------------|
| <b>6-MWT distance</b>                  | 459.8 (6.9) | 481.4 (7.4) | 499.8 (8.3) | <0.001          | <0.001          | 0.011           |
| <b>HR before 6-MWT</b>                 | 80.9 (1.1)  | 75.2 (1.2)  | 73.5 (1.4)  | <0.001          | <0.001          | 0.251           |
| <b>HR after 6-MWT</b>                  | 101.7 (1.6) | 97.3 (1.8)  | 94.5 (2.1)  | 0.020           | 0.001           | 0.226           |
| <b>HR change 6-MWT</b>                 | 21.1 (1.5)  | 22.2 (1.7)  | 20.8 (2.1)  | 0.573           | 0.896           | 0.553           |
| <b>BR before 6-MWT</b>                 | 16.7 (0.3)  | 16.1 (0.4)  | 15.3 (0.4)  | 0.050           | <0.001          | <0.001          |
| <b>BR after 6-MWT</b>                  | 22.9 (0.6)  | 21.2 (0.7)  | 20.4 (0.8)  | 0.017           | 0.002           | 0.302           |
| <b>BR change 6-MWT</b>                 | 6.2 (0.5)   | 5.3 (0.6)   | 5.0 (0.7)   | 0.208           | 0.123           | 0.667           |
| <b>Borg Scale 6-MWT</b>                |             |             |             |                 |                 |                 |
| <b>(6–20)<sup>a)</sup></b>             |             |             |             |                 |                 |                 |
| <b>p<sub>interaction</sub> = 0.044</b> |             |             |             |                 |                 |                 |
| <b>wk05/20–wk08/21</b>                 | 13.3 (0.3)  | 12.6 (0.3)  | 12.8 (0.3)  | <0.001          | <0.001          | <0.001          |
| <b>wk09/21–wk30/21</b>                 | 12.8 (0.3)  | 12.2 (0.3)  | 11.4 (0.4)  | 0.043           | <0.001          | 0.044           |
| <b>wk31/21–wk52/22</b>                 | 14.7 (0.5)  | 13.9 (0.6)  | 11.9 (0.9)  | 0.161           | 0.001           | 0.026           |
| <b>O2 saturation at rest</b>           | 98.1 (0.2)  | 97.4 (0.2)  | 97.8 (0.2)  | 0.002           | 0.210           | 0.148           |
| <b>O2 saturation after 6-MWT</b>       | 97.8 (0.1)  | 97.6 (0.1)  | 97.7 (0.1)  | 0.027           | 0.208           | 0.534           |
| <b>BP<sub>sys</sub></b>                | 129.4 (1.4) | 127.9 (1.5) | 123.0 (1.7) |                 |                 |                 |
| <b>BP<sub>dia</sub></b>                | 82.0 (1.2)  | 77.3 (1.4)  | 80.1 (1.5)  |                 |                 |                 |
| <b>FAS</b>                             | 34.3 (0.7)  | 30.9 (0.8)  | 28.2 (0.9)  | <0.001          | <0.001          | 0.003           |
| <b>GAD-7</b>                           | 9.1 (0.4)   | 7.8 (0.4)   | 5.8 (0.5)   | <0.001          | <0.001          | <0.001          |
| <b>PHQ-9</b>                           | 11.4 (0.4)  | 9.4 (0.5)   | 7.9 (0.5)   | <0.001          | <0.001          | 0.002           |
| <b>MoCA</b>                            | 25.5 (0.2)  | 26.2 (0.3)  | 26.7 (0.4)  | 0.016           | <0.001          | 0.125           |
| <b>CAT</b>                             | 17.1 (0.5)  | 14.3 (0.6)  | 12.1 (0.6)  | <0.001          | <0.001          | <0.001          |
| <b>MCRS</b>                            | 14.4 (1.0)  | 12.6 (1.1)  | 7.5 (1.4)   | 0.190           | <0.001          | 0.003           |
| <b>VR-12 (MCS)</b>                     | 23.5 (1.1)  | 28.2 (1.2)  | 33.5 (1.3)  | <0.001          | <0.001          | <0.001          |
| <b>VR-12 (PCS)<sup>a)</sup></b>        |             |             |             |                 |                 |                 |
| <b>p<sub>interaction</sub> = 0.007</b> |             |             |             |                 |                 |                 |
| <b>wk05/20–wk08/21</b>                 | 33.4 (1.4)  | 37.8 (1.5)  | 39.4 (1.5)  | <0.001          | <0.001          | 0.187           |
| <b>wk09/21–wk30/21</b>                 | 33.2 (1.8)  | 38.6 (1.8)  | 42.2 (1.9)  | <0.001          | <0.001          | <0.001          |
| <b>wk31/21–wk52/22</b>                 | 29.3 (2.6)  | 30.8 (2.9)  | 44.9 (3.5)  | 0.536           | <0.001          | <0.001          |
| <b>ITQ-1</b>                           | 10.7 (0.7)  | 9.3 (0.8)   | 7.4 (0.9)   | 0.040           | <0.001          | 0.014           |

## T0 visit

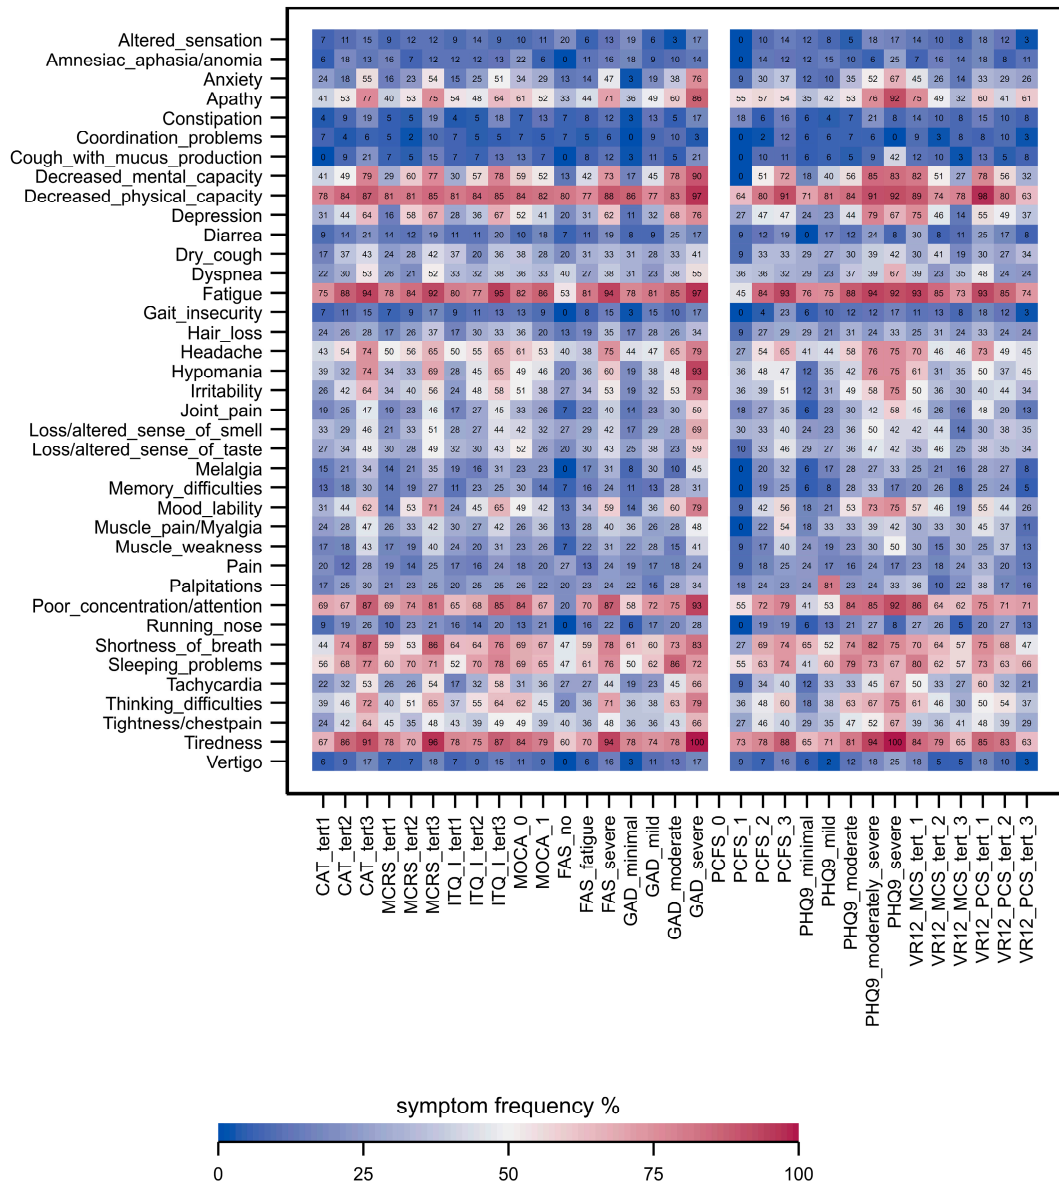

**Figure S1:** Frequency (in %) of Symptoms and Scores at baseline (T0)

CAT (COPD Assessment Test) , MCRS (Median COVID Recovery Score) ITQ-I (International Trauma Questionnaire part 1), and VR12 (Veterans Rand 12-Item Health Survey) reported in tertiles of sample distribution (tert1, tert2, tert3); MoCA (Montreal Cognitive Assessment) reported below and above cutoff for normal (26 points) (0=below, 1 above), FAS (Fatigue Assessment Scale) reported as no fatigue (no), fatigue (fatigue) and severe fatigue (severe) according to cutoffs (<21: no, 22-34: fatigue, ≥35severe fatigue), GAD-7 (Generalized Anxiety Disorder Scale-7) reported as minimal, mild, moderate and severe according to sum score cutoffs (<5: minimal, 5-9: mild, 10-14: moderate, ≥15 severe), PCFS (Post-COVID-Functional-Status) reported as scale grade 0, 1, 2, 3 according to patient self report, PHQ-9 (Patient Health Questionnaire) reported as minimal, mild, moderate moderately severe and severe symptoms of depression according to sum score (<5: minimal, 5-9: mild, 10-14: moderate, 15-19: moderately, ≥ 20: severe)

## T1 visit

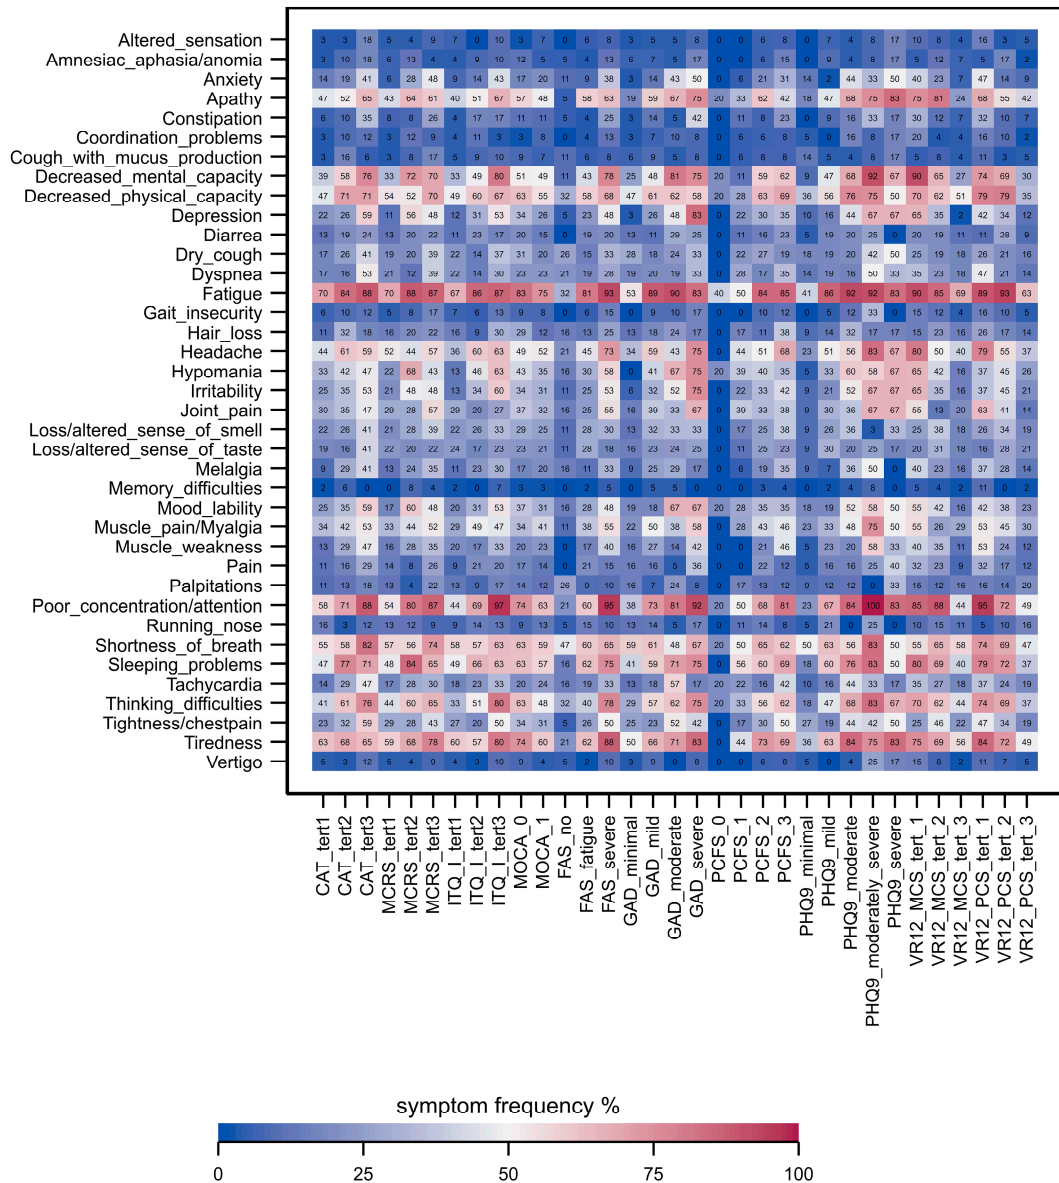

**Figure S2:** Frequency (in %) of Symptoms and Scores at T1

CAT (COPD Assessment Test) , MCRS (Median COVID Recovery Score) ITQ-I (Posttraumatic Stress Disorder), and VR12 (Veterans Rand 12-Item Health Survey) reported in tertiles of sample distribution (tert1, tert2, tert3); MoCA (Montreal Cognitive Assessment) reported below and above cutoff for normal (26 points) (0=below, 1 above), FAS (Fatigue Assessment Scale) reported as no fatigue (no), fatigue (fatigue) and severe fatigue (severe) according to cutoffs (<21: no, 22-34: fatigue, ≥35severe fatigue), GAD-7 (Generalized Anxiety Disorder Scale-7) reported as minimal, mild, moderate and severe according to sum score cutoffs (<5: minimal, 5-9: mild, 10-14: moderate, ≥15 severe), PCFS (Post-COVID-Functional-Status) reported as scale grade 0, 1, 2, 3 according to patient self report, PHQ-9 (Patient Health Questionnaire) reported as minimal, mild, moderate moderately severe and severe symptoms of depression according to sum score (<5: minimal, 5-9: mild, 10-14: moderate, 15-19: moderately, ≥ 20: severe)

## T2 visit

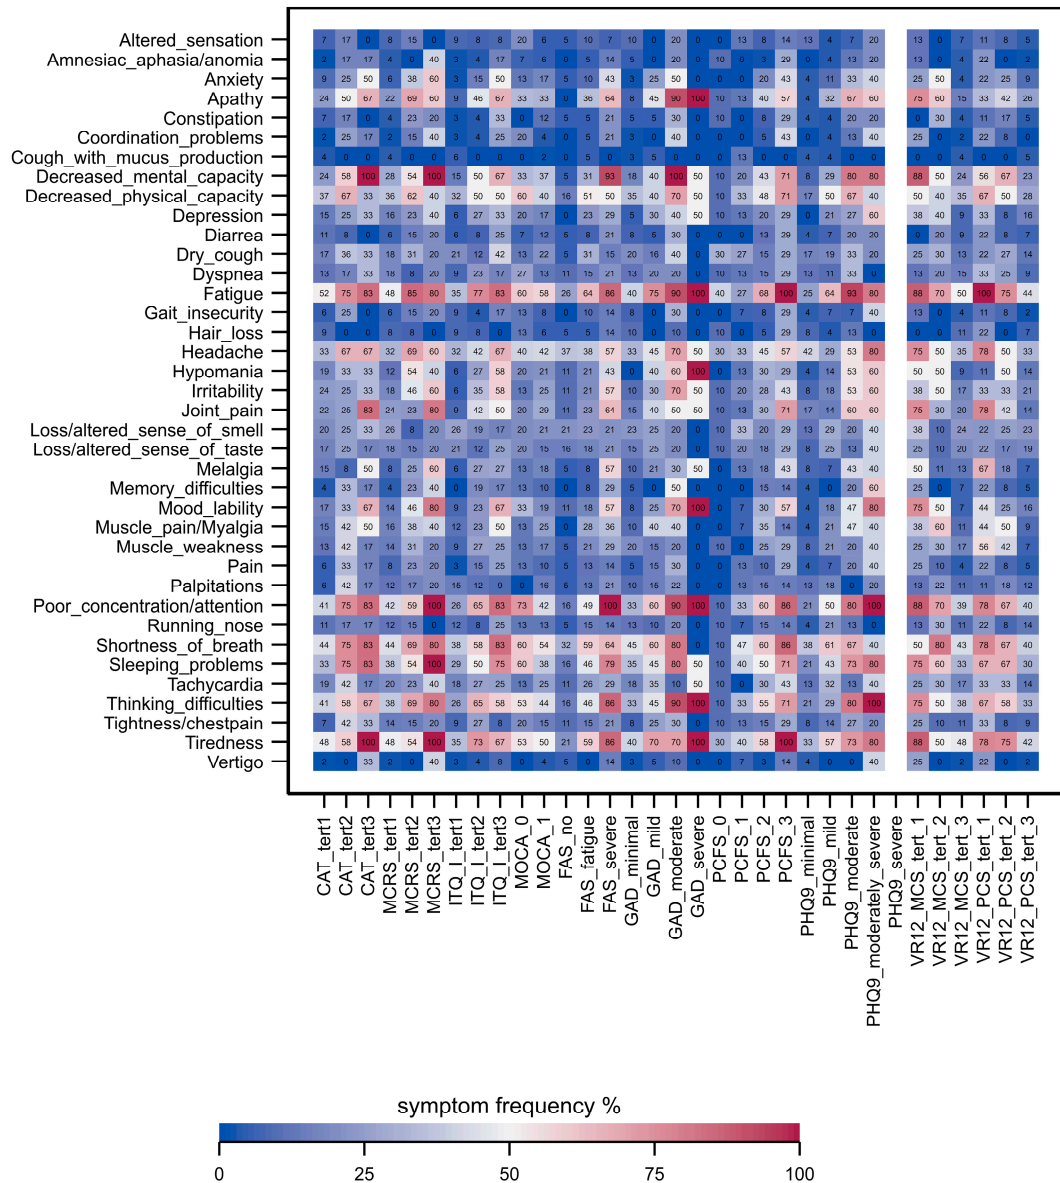

**Figure S3:** Frequency (in %) of Symptoms and Scores at T2

CAT (COPD Assessment Test) , MCRS (Median COVID Recovery Score) ITQ-I (Posttraumatic Stress Disorder), and VR12 (Veterans Rand 12-Item Health Survey) reported in tertiles of sample distribution (tert1, tert2, tert3); MoCA (Montreal Cognitive Assessment) reported below and above cutoff for normal (26 points) (0=below, 1 above), FAS (Fatigue Assessment Scale) reported as no fatigue (no), fatigue (fatigue) and severe fatigue (severe) according to cutoffs (<21: no, 22-34: fatigue, ≥35severe fatigue), GAD-7 (Generalized Anxiety Disorder Scale-7) reported as minimal, mild, moderate and severe according to sum score cutoffs (<5: minimal, 5-9: mild, 10-14: moderate, ≥15 severe), PCFS (Post-COVID-Functional-Status) reported as scale grade 0, 1, 2, 3 according to patient self report, PHQ-9 (Patient Health Questionnaire) reported as minimal, mild, moderate moderately severe and severe symptoms of depression according to sum score (<5: minimal, 5-9: mild, 10-14: moderate, 15-19: moderately, ≥ 20: severe)
